# Supplementary material
Source: PubMed Central journal article supplement (PMC3690869)
Supplement: 1305987110_pnas.201305987SI.pdf [file 1305987110_pnas.201305987SI.pdf]

# Supporting Information

Li et al. 10.1073/pnas.1305987110

## SI Materials and Methods

**Construction and Testing of Zinc Finger Proteins.** Several criteria have been put forth to define genomic safe harbors (1, 2). Ideally, a safe harbor should be distant from the 5' end of a gene, and especially distant from any oncogene. Gene addition should be outside a transcriptional unit, including microRNAs, and outside ultraconserved regions of the human genome. The location must be accessible to allow the transposon and transposase to reach the target sequence, thereby promoting efficient integration. A transcriptionally active region would help to ensure that the DNA is accessible and may be required to ensure stable expression of the therapeutic inserted transgene. We chose human *ROSA26* and L-gulonono- $\gamma$ -lactone oxidase (*GULOP*) loci as two candidate safe harbors. We reasoned that, because mouse *Rosa26* is a target for many site-specific insertions of foreign DNA with no known adverse effects, the human *ROSA26* (3) also represents a safe harbor candidate. *GULOP* is a unitary pseudogene that is far distant from neighboring transcriptional units. In most nonhuman mammals, *GULOP* synthesizes the precursor of L-ascorbic acid (vitamin C); however, in humans, the majority of the gene has been deleted, and within the remaining sequence several anomalous nucleotide changes have occurred (4, 5). None of the genes flanking *GULOP* or *ROSA26* are known tumor suppressors or oncogenes. Neither candidate encodes a protein product, although *ROSA26* encodes a noncoding RNA.

To identify regions within these genes that are rich in *piggyBac* target sequence sites TTAA, we developed a scoring algorithm that analyzed TTAA density for indicated regions (Fig. S4). For each TTAA, the number of adjacent sites was determined within a given window. A 128-bp window on either side of each site was used; thus the score denotes the TTAA density within a 256-bp sliding window.

Six-finger zinc finger arrays were assembled using two-finger zinc finger units as previously described (6). Two-finger units, each expected to specify 6 bp of DNA, were chosen from three-finger zinc finger proteins (ZFPs) engineered by the oligomerized pool engineering method or used to practice the context-dependent assembly method (7, 8). Using these two-finger units, we assembled six-finger arrays targeted to TTAA-rich regions within the *ROSA26* and *GULOP* sites (Fig. S4).

**Bacterial Two-Hybrid and Mammalian One-Hybrid Assays.** The *GULOP* and human *ROSA26* zinc finger proteins were assayed for activity using a bacterial two-hybrid-based reporter system (7, 8) (Fig. S5).  $\beta$ -Galactosidase assays for assessing the DNA-binding activities of zinc finger proteins in a bacterial two-hybrid assay were performed as described previously (8). Mammalian one-hybrid assays were performed as described previously (9) (Fig. S5). Briefly, the activation plasmids were constructed by inserting cDNA encoding a C-terminal fusion of the herpes simplex virus protein 16 activation domain and each of the engineered ZFPs into the BamHI/XhoI-digested pCAGGs backbone. The ZFP target reporter plasmid was constructed by annealing oligos containing four copies in tandem of the ZFP target sequence and cloning the annealed oligos upstream of a minimal human thymidine kinase promoter driving firefly luciferase in the pTATA vector (a kind gift from James Darnell, Laboratory of Molecular Cell Biology, The Rockefeller University, New York, NY). HeLa cells were transfected with 0.4  $\mu$ g each of ZFP activator and target reporter plasmids using Lipofectamine 2000 (Invitrogen) as directed by the manufacturer. Transiently transfected cells were harvested in 1 $\times$  Passive Lysis Buffer (Promega) after 48 h.

Twenty- $\mu$ l lysates were assayed using the Luciferase Reporter Assay System (Promega) according to the manufacturer's instructions. Based on the results of these assays, we selected the ZFPs termed *ROSA3b* and *GULOP1b* for further use in this study. The *ROSA26* target site is GATGCCTGGTAGGGATGCA (58% GC) and the *GULOP* target site is TGGGATGCAGCCAGATGAG (58% GC). The DNA sequences of the ZFPs are shown (Fig. S6).

**Integration-Site Recovery for Illumina HiSeq2000 Sequencing.** Integration sites were recovered as described (10). Briefly, HeLa cells ( $5 \times 10^6$ ) were transfected with 10  $\mu$ g *pXL-BacII PB-GFP/Puro* transposon plasmid and 2  $\mu$ g of each transposase plasmid, and then integrants were selected with puromycin (0.5  $\mu$ g/mL) for 3 wk. Genomic DNA from three separate transfections was extracted from the integration library using the DNeasy tissue kit (Qiagen). Pooled DNA (2  $\mu$ g) was digested overnight with ApoI or BstYI at 50  $^{\circ}$ C and 60  $^{\circ}$ C, respectively; DNA fragments were purified with the QIAquick PCR purification kit (Qiagen) and ligated to ApoI and BstYI linkers overnight at 16  $^{\circ}$ C. Nested PCR was carried out under stringent conditions using the transposon end-specific primers AAACCTCGATATACAGACCGATAA-AACACATGCGTCAATTTTACGC (primary) and AATGAT-ACGGCGACCACCGAGATCTACACTCTTTCCCTACACG-ACGCTCTTCCGATCTXXXXCGTACGTCACAATATGAT-TATCTTTC (secondary; XXXX denotes bar code; underlined sequence indicates Illumina cluster-generation sequence) and linker-specific primers CGTAGGGAGCAAGCAGAAGACGG (primary) and CAAGCAGAAGACGGCATAACGAGCTCTT-CCGATCT (secondary). DNA barcodes were included in the second-round PCR primers to track sample origin. The PCR products were gel-purified, pooled, and sequenced using the Illumina HiSeq2000 sequencing platform.

Reads from each flow cell lane were trimmed according to the barcodes and linkers expected, using a custom R wrapper for the BioStrings trimLRPatterns function (11) and allowing no mismatches in the barcode and up to two mismatches in the linker sequence. Trimmed reads were aligned to the hg18 human genome build using Bowtie (12), allowing two mismatches in each alignment and requiring the alignment to be unique.

Insertion-site coordinates were sorted and collapsed; multiple reads often mapped to a single site. Furthermore, many sites with large numbers of reads were immediately flanked by a few sites with one or two reads. Upon examination, these nearly always prove to be slight alignment errors. Thus, insertion counts in this configuration are collapsed into the site with the most counts, using a simple Perl script that scans for insertions mapping to adjacent positions. This leaves a set of sites, each associated with a number of mapped insertions. As we do not know whether multiple recovered insertions are real or are PCR artifacts, we proceed with the analysis using only the sites. For a subset of the sites, we have recovered insertions in both orientations (on the + and the - strand). These are necessarily independent events, and these "bidirectional" sites are noted separately.

For genome-wide feature correlation analysis, we could not include all sites, due to computational limitations. Thus, we included all bidirectional sites for each of the experiments in HeLa cells, as well as a randomly chosen subset of sites whose insertion counts were in the third quartile of the insertion counts for all sites, reasoning that these should be strong sites, yet representative of the insertion landscape for each experiment. After this

process we had subsets of roughly 2,500–3,000 sites for each of the experiments.

Initial sites, insertion counts, and bidirectional status (0 if not bidirectional, 1 otherwise) are provided as supplemental -s; the

files labeled “sites\_analyzed” are those that were included in the genome-wide analysis and the others contain the full list of sites for each element. R and Perl scripts are available upon request.

1. Papapetrou EP, et al. (2011) Genomic safe harbors permit high  $\beta$ -globin transgene expression in thalassemia induced pluripotent stem cells. *Nat Biotechnol* 29(1):73–78.
2. DeKelver RC, et al. (2010) Functional genomics, proteomics, and regulatory DNA analysis in isogenic settings using zinc finger nuclease-driven transgenesis into a safe harbor locus in the human genome. *Genome Res* 20(8):1133–1142.
3. Irion S, et al. (2007) Identification and targeting of the ROSA26 locus in human embryonic stem cells. *Nat Biotechnol* 25(12):1477–1482.
4. Zhang ZD, Frankish A, Hunt T, Harrow J, Gerstein M (2010) Identification and analysis of unitary pseudogenes: Historic and contemporary gene losses in humans and other primates. *Genome Biol* 11(3):R26.
5. Inai Y, Ohta Y, Nishikimi M (2003) The whole structure of the human nonfunctional L-gulono-gamma-lactone oxidase gene—the gene responsible for scurvy—and the evolution of repetitive sequences thereon. *J Nutr Sci Vitaminol (Tokyo)* 49(5):315–319.
6. Moore M, Klug A, Choo Y (2001) Improved DNA binding specificity from polyzinc finger peptides by using strings of two-finger units. *Proc Natl Acad Sci USA* 98(4):1437–1441.
7. Maeder ML, et al. (2008) Rapid “open-source” engineering of customized zinc-finger nucleases for highly efficient gene modification. *Mol Cell* 31(2):294–301.
8. Sander JD, et al. (2011) Selection-free zinc-finger-nuclease engineering by context-dependent assembly (CoDA). *Nat Methods* 8(1):67–69.
9. Yant SR, Huang Y, Akache B, Kay MA (2007) Site-directed transposon integration in human cells. *Nucleic Acids Res* 35(7):e50.
10. Burnight ER, et al. (2012) A hyperactive transposase promotes persistent gene transfer of a piggyBac DNA transposon. *Mol Ther Nucleic Acids* 1:e50.
11. Pages H, Aboyou P, Gentleman R, DebRoy S (2006) Biostrings: String objects representing biological sequences, and matching algorithms. Bioconductor. Version 2.22.0.
12. Langmead B, Trapnell C, Pop M, Salzberg SL (2009) Ultrafast and memory-efficient alignment of short DNA sequences to the human genome. *Genome Biol* 10(3):R25.

|           |     |               |      |      |       |        |       |      |      |         |      |       |         |     |
|-----------|-----|---------------|------|------|-------|--------|-------|------|------|---------|------|-------|---------|-----|
| Adineta   | 201 | EERKRTDKFAVSR | REI  | WTF  | SRRKF | KEMY   | NPG   | SHGT | D    | ERLLGFR | KCC  | PPRQY | 251     |     |
| Adineta_1 | 194 | EERKKADKFAA   | REI  | WLF  | DQDKL | KTCY   | TPL   | NI   | T    | EQLLGFR | KCC  | PPRQF | 244     |     |
| Anopheles | 232 | SQRLQTDKFA    | LS   | DVFS | RFVSN | CQTNY  | VPG   | PHIS | V    | DEQLF   | PSK  | TRC   | PPFQF   | 282 |
| Bombyx    | 250 | DERKQTDNMA    | AFRS | IFDQ | FVQC  | CQNAYS | PSE   | FLT  | I    | DEMLLS  | SFR  | RC    | CLFRVY  | 300 |
| Ciona     | 203 | AENIDNDK      | LKVR | RPVY | DLI   | VARW   | KALYN | LGE  | HIS  | IDE     | GMMK | WR    | RLGFRVY | 253 |
| Heliothis | 224 | SERLKTDKL     | AARE | FTD  | LMMN  | NFIN   | INNY  | CASE | NVT  | IDE     | QLP  | AFR   | GRFS    | 274 |
| Takifugu  | 229 | PARWQRD       | KLV  | RT   | VWDK  | WRRL   | PLLY  | NP   | GNVT | IDE     | QLM  | PF    | RCP     | 279 |
| piggyBat  | 203 | -IVNESD       | RLCK | VR   | PLD   | YFV    | PKF   | I    | NI   | YK      | PH   | Q     | LS      | 252 |
| Tni       | 233 | PTLREND       | VFT  | TP   | VKI   | WDL    | F     | I    | H    | Q       | C    | I     | Q       | 283 |
|           |     |               |      |      |       |        |       |      |      |         |      |       |         |     |
| Adineta   | 252 | IPSKPK        | KYAI | KFW  | CV    | DVNS   | YIF   | DA   | F    | P       | Y    | I     | ER      | 301 |
| Adineta_1 | 245 | IPTKPK        | KYGL | KFW  | LC    | VD     | AE    | S    | Y    | V       | L    | N     | A       | 294 |
| Anopheles | 283 | MASKPK        | KYG  | KYMA | V     | D      | S     | K    | Y    | V       | V    | N     | I       | 332 |
| Bombyx    | 301 | IPNKP         | KYGI | KIL  | L     | V      | D     | A    | K    | N       | F    | Y     | V       | 351 |
| Ciona     | 254 | NKPKPK        | KYGI | KSY  | L     | A      | D     | S    | H    | S       | H    | C     | W       | 297 |
| Heliothis | 275 | MPNKP         | KYGI | KHY  | L     | V      | D     | S    | A    | T       | F    | Y     | L       | 325 |
| Takifugu  | 280 | LPSKPK        | NGIK | IWA  | A     | C      | D     | A    | T    | S       | S    | Y     | A       | 329 |
| piggyBat  | 253 | NACKIV        | KYGI | L    | V     | R      | L     | C    | E    | S       | D    | T     | G       | 295 |
| Tni       | 284 | IPNKP         | KYGI | KIL  | M     | C      | D     | S    | G    | T       | K    | Y     | M       | 332 |
|           |     |               |      |      |       |        |       |      |      |         |      |       |         |     |
| Adineta   | 302 | MKPMYGS       | RNV  | T    | I     | D      | N     | F    | F    | T       | S    | I     | H       | 350 |
| Adineta_1 | 295 | LRPFYGS       | RNV  | T    | K     | D      | N     | F    | F    | T       | S    | V     | P       | 343 |
| Anopheles | 333 | VDPYLN        | RGR  | N    | V     | T      | C     | D    | N    | F       | F    | T     | S       | 381 |
| Bombyx    | 352 | IQPVAR        | S    | R    | N     | V      | T     | F    | D    | N       | W    | F     | T       | 401 |
| Ciona     | 298 | TSCHKP        | LW   | H    | S     | L      | M     | D    | N    | F       | Y    | N     | S       | 345 |
| Heliothis | 326 | TEPIW         | G    | T    | G     | R      | N     | V    | T    | D       | N    | W     | F       | 375 |
| Takifugu  | 330 | VSGT          | --   | Q    | M     | T      | D     | H    | M    | R       | H    | F     | F       | 376 |
| piggyBat  | 296 | VSPYTD        | S    | W    | H     | I      | Y     | D    | N    | Y       | N    | S     | V       | 343 |
| Tni       | 333 | SKPVH         | G    | S    | C     | R      | N     | I    | T    | C       | D    | N     | W       | 383 |
|           |     |               |      |      |       |        |       |      |      |         |      |       |         |     |
| Adineta   | 351 | SNKNR         | D    | V    | G     | S      | S     | I    | F    | G       | F    | S     | -       | 393 |
| Adineta_1 | 344 | SSKIRE        | I    | G    | S     | S      | L     | F    | G    | F       | E    | -     | D       | 386 |
| Anopheles | 382 | KVKEK         | L    | Y    | F     | T      | K     | A    | F    | K       | -    | S     | -       | 423 |
| Bombyx    | 402 | RTD           | -    | R    | P     | N      | S     | S    | V    | F       | G    | F     | Q       | 443 |
| Ciona     | 346 | TPPNQ         | M    | K    | G     | D      | I     | I    | A    | R       | Q    | N     | S       | 388 |
| Heliothis | 376 | PKRTR         | T    | E    | H     | S      | S     | L    | F    | G       | F    | Q     | -       | 418 |
| Takifugu  | 377 | TSKNR         | P    | V    | K     | S      | S     | Q    | F    | A       | Y    | T     | -       | 419 |
| piggyBat  | 344 | TISLK         | -    | K    | E     | T      | K     | F    | I    | R       | K    | -     | N       | 388 |
| Tni       | 384 | NSRSE         | P    | V    | G     | T      | S     | M    | F    | C       | D    | -     | G       | 426 |
|           |     |               |      |      |       |        |       |      |      |         |      |       |         |     |
| Adineta   | 394 | -----         | D    | I    | -     | G      | T     | C    | K    | P       | N    | I     | V       | 432 |
| Adineta_1 | 387 | -----         | D    | N    | -     | K      | T     | K    | P    | V       | I    | I     | L       | 425 |
| Anopheles | 424 | -----         | G    | N    | -     | K      | K     | P    | E    | T       | V    | A     | F       | 463 |
| Bombyx    | 444 | -----         | D    | E    | S     | T      | G     | E    | K    | Q       | K    | P     | E       | 485 |
| Ciona     | 389 | I             | T    | R    | R     | Q      | R     | R    | G    | G       | E    | X     | E       | 437 |
| Heliothis | 419 | -----         | V    | E    | S     | -      | E     | K    | K    | P       | E    | I     | I       | 458 |
| Takifugu  | 420 | -----         | C    | D    | Q     | -      | E     | H    | K    | P       | E    | I     | I       | 459 |
| piggyBat  | 389 | -----         | D    | R    | T     | S      | K     | K    | -    | K       | I    | V     | K       | 431 |
| Tni       | 427 | -----         | N    | E    | -     | S      | T     | K    | P    | Q       | M    | V     | Y       | 465 |

**Fig. S1.** Protein sequence alignment of *piggyBac* family members. The catalytic domain of eight *piggyBac* transposase family members were aligned to *Trichoplusia ni* (Tni) (1, 2). Blue boxes indicate the requisite catalytic amino acids, red boxes indicate conserved arginines and lysines, and green boxes indicate the positions of HIV integrase mutations with known altered target joining in HIV integrase (3).

- Mitra R, Fain-Thornton J, Craig NL (2008) *piggyBac* can bypass DNA synthesis during cut and paste transposition. *EMBO J* 27(7):1097–1109.
- Mitra R, et al. (2013) Functional characterization of *piggyBat* from the bat *Myotis lucifugus* unveils an active mammalian DNA transposon. *Proc Natl Acad Sci USA* 110(1):234–239.
- Harper AL, Skinner LM, Sudol M, Katzman M (2001) Use of patient-derived human immunodeficiency virus type 1 integrases to identify a protein residue that affects target site selection. *J Virol* 75(16):7756–7762.

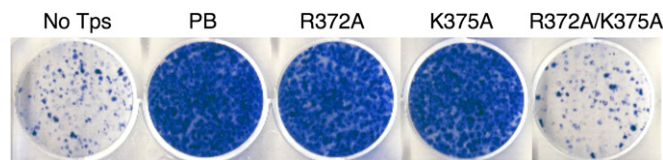

**Fig. S2.** Colony formation assay with PB<sup>R372A</sup> and PB<sup>K375A</sup> individual mutations. HeLa cells were transiently cotransfected with a transposon expressing blasticidin<sup>r</sup> and the indicated mutant *piggyBac* (PB) transposase. Cells were selected for blasticidin resistance and stained with methylene blue to identify viable cell colonies. No transposase (–Tps), wild-type transposase (PB), and PB<sup>R372A/K375A</sup> transposase were included as controls.

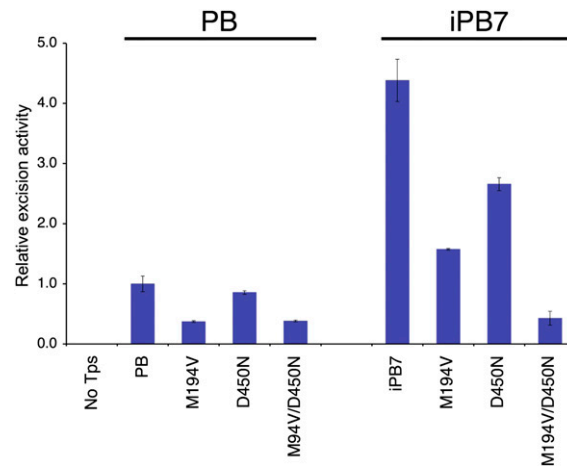

**Fig. S3.** Excision assays of individual M194V and D450N mutations on the PB or iPB7 transposase backbones. The indicated wild-type PB (Left) or insect-derived *piggyBac* transposase 7 (iPB7) (Right) mutants were transiently transfected into HEK293 *GFP::PB* cells. The frequency of excision is indicated by GFP fluorescence intensity, determined by FACS analysis, and normalized to the wild-type PB control. No transposase (–Tps) and unmodified iPB7 were included as additional controls.

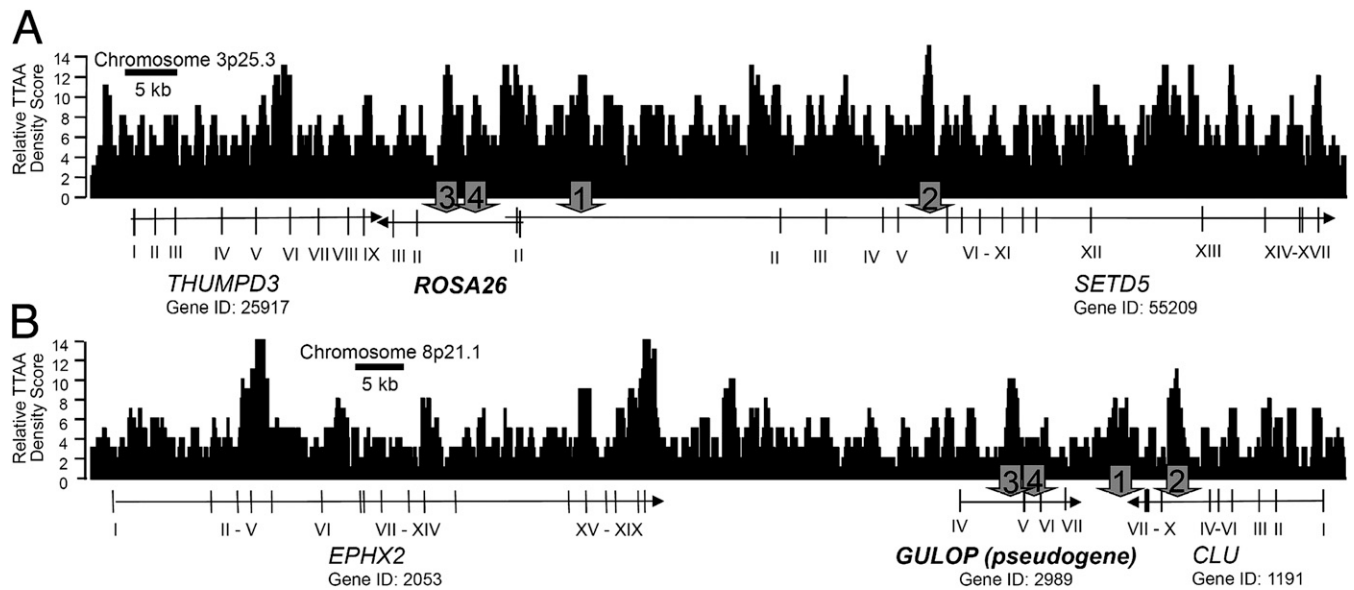

**Fig. S4.** Schematic representation of ZFP target genomic loci. (A) The human *ROSA26* locus is flanked by the *THUMPD3* and *SETD5* genes on chromosome 3p25.3. (B) The *GULOP* pseudogene is flanked by *EPHX2* and *CLU* in chromosome 8p21.1. Gray arrows indicate approximate ZFP target sites. The TTA density score was determined for a given 256-bp window.



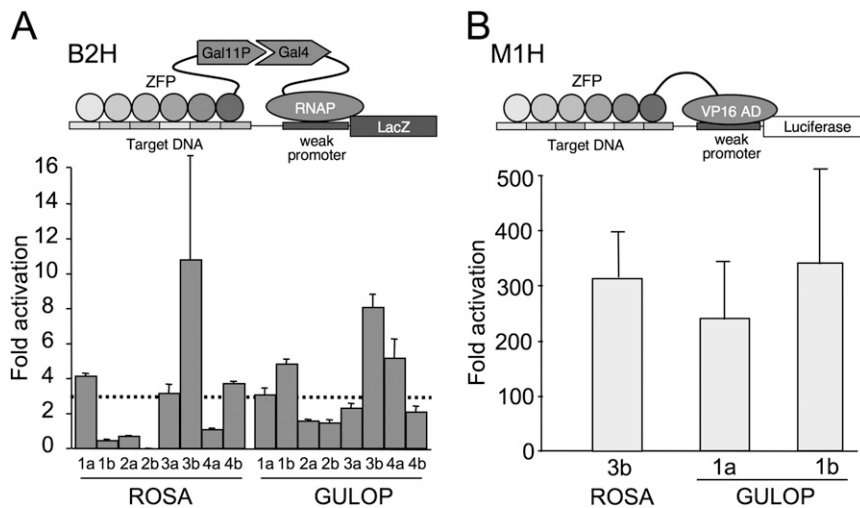

**Fig. 55.** Engineered ZFP activity in cells. (A) A bacterial two-hybrid (B2H) assay was used to assay activity of engineered ZFPs. A six-finger ZFP is fused to the Gal11P fragment, shown schematically. ZFP binding to its target recruits RNA polymerase to a weak promoter driving the reporter *lacZ* gene in bacteria through interaction of the *GAL4* domain fused to the RNAP. Eight ZFPs targeting four sites at or near the *ROSA26* locus or eight ZFPs targeting four sites at or near the *GULOP* locus were evaluated. Bars represent *LacZ* activity in bacteria transformed with the ZFP library. The dashed line represents an arbitrary threshold at which B2H activity is typically effective in mammalian cells. (B) For mammalian one-hybrid (M1H) assays, activator plasmids expressing the ZFPs fused to the VP16 activation domain from Herpes Simplex Virus 1 were cotransfected with plasmids containing four copies of the target sequence upstream of a minimal promoter driving firefly luciferase, shown schematically. ZFP binding to its target sequence activates luciferase transcription. ZFP activity is reported as a function of luciferase activity. Bars represent mean fold activation in cells transfected with activator and reporter plasmids relative to luciferase activity in cells transfected with reporter alone. *n* = 3.

#### GULOP

```

ATGTCTAGACCAGGAGAGCGACCATTCAGTGCCGGATTGTCATGCGCAATTTTCCAG
ACAGGCCAACCTCGTCAGACACAGGACACATACTGGTGAGAAGCCCTTCCAGTGTC
GCATCTGTATGCGCAATTTTTCAGTGGCCGATAATCTGACTAGGCATCTCAGGACTCAC
ACTGGGGGAGGAGGCTCCCAGAAGCCTTTTTCAGTGCAGGATCTGTATGAGAAATTTTC
AGATTCTCTGTGCTGAGGAGGCACCTCAGGACGCATACCGGAGAAAAACCATTCAGT
GTAGAATTTGCATGAGAACTTTAGTCAAGGCGGACCCTTAGGAGGCACCTTGAAAAACA
CATACAGGCTCCCAGAAGCCATTTCAGTGGCCGATCTGTATGCGCAACTTTTCTGTGCA
CCATAACCTCGTGAGACATCTGAGGACTCACACTGGAGAGAAGCCATTTTCAGTGTAGGA
TTTGCATGAGAAATTTTAGTAGGTCCGACCATCTGAGTCTTCACCTGAAGACACATCTG
CGG
  
```

#### ROSA26

```

ATGTCTAGACCTGGCGAACGCCATTTTCAGTGCCGGATTGTCATGAGAAATTCAGCCT
TAAGCATCTCTGCTTCGCCACACGCGGACCCACACCGGAGAGAAGCCCTTCCAGTGCC
GGATTTGTATGCGAAATTTTCTCTGCGCCACAATCTTAGGAGGCACCTTGCGAATCAC
ACCGGCAGCCAGAACTTTCCAGTGTGCAATCTGCATGCGCAATTTTAGTTCGAGAGC
ACATCTCTTGAGCCACCTGCGAACGCATACCGGCGAGAAGCCCTTCCAGTGCAGGATCT
GCATGCGGAATTCAGCGAGGCACATCACCTGTCTCGCCATCTGAAGACCCATACAGGC
GGTGGAGGTAGTCAAAGCCGTTTCAGTGCAGGATTTGTATGAGGAATTTTCAGTGATAG
TCCAACACTTCGGCGACACCTGCGCACTCACACAGGCGAGAAGCCGTTCCAGTGCAGGA
TCTGCATGAGAAATTTTCCGTAAGACACAATCTCACGGCGACCTTAAAACACACCTG
AGA
  
```

**Fig. 56.** Sequences of the GULOP and ROSA26 ZFPs. The primary sequence of the DNAs encoding the GULOP or ROSA26 ZFPs are shown.



**Table S1. Imprecise excision by excision competent<sup>hyper</sup>/integration defective mutant transposases**

| Transposase                     | Imprecise repair, % |
|---------------------------------|---------------------|
| PB                              | 0.13*               |
| PB <sup>R372A/K375A</sup>       | 0.14                |
| PB <sup>M194V/R372A/K375A</sup> | 0.21                |
| PB <sup>R372A/K375A/D450N</sup> | 0.27                |
| iPB7                            | 0.24*               |

\*Imprecise excision frequencies were determined as described in *Materials and Methods*. The imprecise excision frequency of Int<sup>+</sup> transposases is underestimated by 40–60% because imprecise excisions that are accompanied by transposon reintegrations are not counted.

**Table S2. Illumina sequencing of ZFP-iPB7-mediated genomic integrations**

| Element                          | Reads      | Alignments | Initial sites | Collapsed sites | TTAA sites |
|----------------------------------|------------|------------|---------------|-----------------|------------|
| iPB7                             | 26,300,573 | 3,011,317  | 45,523        | 43,984          | 40,800     |
| GLO-iPB7                         | 79,825,963 | 9,897,552  | 61,914        | 58,900          | 54,803     |
| GLO-iPB7 <sup>R372A/D450N</sup>  | 94,236,814 | 11,829,337 | 74,210        | 70,393          | 66,379     |
| ROSA-iPB7                        | 85,295,144 | 10,691,398 | 62,795        | 59,609          | 55,924     |
| ROSA-iPB7 <sup>R372A/D450N</sup> | 49,842,350 | 6,964,687  | 41,599        | 39,659          | 37,033     |

The number of total mapped integration reads and unique alignments for each ZFP-iPB7 chimera and unmodified iPB7 control are indicated and were determined as described in *Materials and Methods* and *SI Materials and Methods*. Collapsed sites, TTAA+ non-TTAA insertion sites; TTAA sites, only TTAA insertion sites.
